# Supplementary material for: Identification of Novel Genetic Variants in CVID Patients With Autoimmunity, Autoinflammation, or Malignancy
Source: PubMed Central journal article supplement (PMC6996488; doi:10.3389/fimmu.2019.03022), 2020-01-27
Supplement: Data_Sheet_1.pdf [file Data_Sheet_1.pdf]

# **Identification of novel genetic variants in CVID patients with autoimmunity, autoinflammation, or malignancy**

**Mette Christiansen<sup>1\*</sup>, Rasmus Offersen<sup>2\*</sup>, Jens Magnus Bernth Jensen<sup>1</sup>, Mikkel Steen Petersen<sup>1</sup>, Carsten S. Larsen<sup>2</sup>, and Trine H. Mogensen<sup>2,3,4</sup>**

- 1) Department of Clinical immunology, Aarhus University Hospital (AUH)**
- 2) Department of Infectious Diseases, AUH**
- 3) Department of Biomedicine, Aarhus University (AU)**
- 4) Department of Clinical Medicine, AU**

**Running title: Whole exome sequencing of CVID patients**

**Key words: common variable immunodeficiency (CVID), WES, autoimmunity, granuloma, malignancy, B cell phenotype**

**\*these authors contributed equally**

**Corresponding author: Trine H. Mogensen, Department of Infectious Diseases, Palle Juul-Jensens Boulevard 99, 8200 Aarhus N, Denmark**

## Supplementary Tables and figures

ACP5, ACTB, ADA, ADA2, ADAM17, ADAMTS13, ADAR, ADRB2, AGA, AICDA, AIM2, AIRE, AK2, ALG13, ALOX5, AP1S3, AP3B1, APOL1, ARHGEF6, ARID5B, ARMS2, ATM, ATR, BACH2, BANK1, BCL10, BLM, BLNK, BLOC1S3, BLOC1S6, BRCA2, BRIP1, BTK, C1QA, C1QB, C1QC, C1R, C1S, C2, C3, C3AR1, C4A, C4B, C4BPA, C4BPB, C5, C5AR1, C5AR2, C6, C7, C8A, C8B, C8G, C9, CA2, CAPG, CARD11, CARD14, CARD9, CARMIL2, CASP1, CASP10, CASP8, CAVIN1, CAVIN1, CCDC103, CCDC114, CCL11, CD19, CD244, CD247, CD27, CD36, CD3D, CD3E, CD3G, CD4, CD40, CD40LG, CD46, CD55, CD59, CD70, CD79A, CD79B, CD81, CD8A, CDCA7, CDKN2B, CEBPE, CFB, CFD, CFH, CFHR1, CFHR2, CFHR3, CFHR4, CFHR5, CFI, CFP, CHD7, CHUK, CIITA, CLCN7, CLEC4D, CLEC6A, CLEC7A, CLPB, CNBP, COG6, COL7A1, COLEC10, COLEC11, COLEC12, COPA, CORO1A, CR1, CR2, CREBBP, CSF1R, CSF2RA, CSF3R, CTC1, CTLA4, CTPS1, CTSC, CXCL10, CXCR4, CYBA, CYBB, DCLRE1C, DDX11, DDX41, DDX58, DGKE, DHFR, DKC1, DNAI1, DNAJC21, DNAL1, DNASE1, DNASE1L3, DNMT3B, DNAAF5, DOCK2, DOCK8, DPP10, DTNBP1, ELANE, ELF4, EPG5, ERAP1, ERCC2, ERCC3, ERCC4, ERCC6L2, ETV6, F11, F12, F13A1, F13B, F5, F7, F8, F9, FADD, FANCA, FANCB, FANCC, FANCD2, FANCE, FANCF, FANCG, FANCI, FANCL, FANCM, FAS, FASLG, FCER1G, FCGR1A, FCGR2A, FCGR2B, FCGR3A, FCGR3B, FCGRT, FCN1, FCN2, FCN3, FERMT3, FGA, FGB, FLG, FOXP1, FOXP3, FPR1, FXII, G3BP1, G6PC, G6PC3, G6PD, GATA1, GATA2, GFI1, GINS1, GJC2, GP1BA, GP1BB, GP9, GPI, GTF2H5, HAX1, HELLS, HLA-C, HLA-DRB1, HNMT, HPS1, HPS3, HPS4, HPS5, HPS6, HTR1A, HTRA1, HYDIN, IBTK, ICOS, IFI16, IFIH1, IFITM3, IFNG, IFNGR1, IFNGR2, IGHG2, IGHM, IGHMBP1, IGKC, IGLL1, IKBKB, IKBKE, IKBKG, IKZF1, IKZF3, IL10, IL10RA, IL10RB, IL12B, IL12RB1, IL13, IL16, IL17F, IL17RA, IL17RB, IL17RC, IL18, IL1RN, IL2, IL20RA, IL21, IL21R, IL23A, IL2RA, IL2RG, IL36RN, IL7R, INO80, INSR, IRAK4, IRF3, IRF5, IRF7, IRF8, ISG15, ITCH, ITGAM, ITGB2, ITK, ITPKC, JAGN1, JAK2, JAK3, KMT2D, KRAS, LAMTOR2, LCK, LIG1, LIG4, LPIN2, LRBA, LRRC32, LRRC6, LRRC8A, LTA, LTBP3, LTBR, LYST, MAGT1, MAL, MALT1, MAN2B1, MANBA, MAP3K14, MAP3K7, MAPK8, MASP1, MASP2, MAVS, MB21D1, MBL2, MC2R, MCM3AP, MCM4, MCM9, MEFV, MKL1, MLPH, MMACHC, MOGS, MPL, MPO, MRE11, MRE11A, MS4A1, MS4A2, MSH5, MSH6, MSN, MST1, MTHFD1, MVK, MYD88, MYH9, MYO5A, MYO5B, MYSM1, NBN, NCF1, NCF2, NCF4, NCSTN, NFAT5, NFKB1, NFKB2, NFKBIA, NFKBIL1, NHEJ1, NHP2, NKX2-5, NLRC3, NLRC4, NLRP1, NLRP12, NLRP13, NLRP2, NLRP3, NLRP4, NLRP7, NME8, NOD2, NOP10, NRAS, NSMCE3, ORAI1, OSTM1, PADI4, PALB2, PARN, PBX1, PCCA, PCCB, PEPD, PGM3, PHF11, PI4KA, PIGA, PIK3CD, PIK3R1, PLA2G7, PLCG2, PLG, PMM2, PMS2, PNP, POLA1, POLE, PRF1, PRKCD, PRKD1, PRKDC, PROC, PROS1, PRPS1, PSENEN, PSMA2, PSMB8, PSTPIP1, PTCRA, PTEN, PTPN11, PTPN22, PTPRC, PTX3, PYCARD, RAB27A, RAC2, RAD50, RAD51C, RAG1, RAG2, RASGRP1, RASGRP2, RASGRP3, RBCK1, RBM8A, RECQL4, RET, RFX5, RFXANK, RFXAP, RHOH, RIPK1, RIPK3, RMRP, RNASEH2A, RNASEH2B, RNASEH2C, RNF168, RNF31, RORA, RORC, RPGR, RPL11, RPL15, RPL26, RPL35A, RPL36, RPL5, RPS10, RPS15, RPS15A, RPS17, RPS19, RPS24, RPS26, RPS27A, RPS28, RPS29, RPS7, RPSA, RSPH9, RTEL1, RUNX1, SAMHD1, SBDS, SCGB1A1, SCGB3A2, SCIMP, SEMA3E, SERAC1, SERPING1, SF3B6, SFTPBP, SH2D1A, SH3BP2, SH3BP5, SIAE, SKIV2L, SLC15A4, SLC22A4, SLC29A3, SLC35A1, SLC35C1, SLC37A4, SLC39A4, SLC46A1, SLC7A7, SLX4, SMARCAL1, SOCS4, SP110, SPINK5, SRP72, STAT1, STAT2, STAT3, STAT4, STAT5A, STAT5B, STIM1, STK4, STX11, STXBP2, TANK, TAP1, TAP2, TAPBP, TAZ, TBC1D1, TBCE, TBK1, TBX1, TCF3, TCIRG1, TCN2, TERC, TERT, TFRC, TGFB1, THBD, TICAM1, TINF2, TIRAP, TLR2, TLR3, TLR4, TLR5, TLR7,

TLR8, TLR9, TMC6, TMC8, TMEM173, TNF, TNFAIP3, TNFRSF11A, TNFRSF13B, TNFRSF13C, TNFRSF1A, TNFRSF4, TNFSF12, TNFSF13B, TPP2, TRAC, TRADD, TRAF2, TRAF3, TRAF3IP2, TRAF6, TREM2, TREX1, TRNT1, TTC37, TTC7A, TYK2, UNC119, UNC13D, UNC93B1, UNG, UPB1, USB1, VAV1, VPREB1, VPS13B, VPS45, WAS, WDR1, WDR5, WIPF1, WRAP53, XIAP, XK, XRCC6, ZAP70, ZBTB24, ZNF296, ZNF341

**Supplementary Table S1. Gene list**

| Case Samples | Gene Symbol | Transcript ID  | Transcript Variant | Protein Variant | gnomAD Frequency | SIFT Function Prediction | PolyPhen-2 Function Prediction | CADD Score | MSC    |
|--------------|-------------|----------------|--------------------|-----------------|------------------|--------------------------|--------------------------------|------------|--------|
| <b>P2</b>    | ERAP1       | NM_016442.4    | c.1432delC         | p.L478fs*14     | 0                |                          |                                | 33         | 3.313  |
|              | ZNF319      | NM_020807.2    | c.272C>T           | p.P91L          | 0.004            | A                        | B                              | 21.8       | 3.313  |
|              | JAK3        | NM_000215.3    | c.361C>T           | p.R121C         | 0.001            | D                        | PoD                            | 23.3       | 0.001  |
| <b>P3</b>    | TREX1       | NM_033629.5    | c.923C>G           | p.S308C         | 0.005            | D                        | PoD                            | 14.6       | 5.605  |
|              | DNASE1L3    | NM_004944.3    | c.97G>C            | p.E33Q          |                  | T                        | PoD                            | 21.3       | 16.330 |
| <b>P4</b>    | COL7A1      | NM_000094.3    | c.2528G>T          | p.R843L         | 0                | D                        | PoD                            | 24.6       | 0.036  |
|              | TCF3        | NM_003200.4    | c.661C>G           | p.L221V         |                  | T                        | PrD                            | 23.2       | 3.313  |
|              | FANCB*      | NM_001018113.2 | c.1140T>A          | p.F380L         | 0.026            | T                        | B                              | 13.12      | 0.001  |
| <b>P5</b>    | PCCB        | NM_000532.4    | c.62T>C            | p.L21P          |                  | T                        | B                              | 22.4       | 0.057  |
|              | DOCK8       | NM_203447.4    | c.2438C>T          | p.T813I         | 0.004            | T                        | B                              | 22.5       | 0.001  |
| <b>P7</b>    | NLRP2       | NM_017852.4    | c.886G>A           | p.A296T         | 0.001            | D                        | B                              | 12.1       | 3.313  |
| <b>P8</b>    | SMARCAL1    | NM_014140.3    | c.1762G>C          | p.A588P         | 0                | T                        | B                              | 22.7       | 6.656  |
|              | INSR        | NM_000208.3    | c.3760T>C          | p.Y1254H        |                  | D                        | B                              | 18.2       | 0.069  |
|              | IL10RA      | NM_001558.3    | c.223T>C           | p.C75R          |                  | D                        | PrD                            | 23.3       | 0.034  |
|              | C5AR2       | NM_018485.2    | c.520C>T           | p.R174W         | 0                | D                        | PrD                            | 23.7       | 14.180 |
| <b>P9</b>    | CFHR4       | NM_001201550.3 | c.579T>G           | p.C193W         |                  | D                        | PrD                            | 22.4       | 3.313  |
|              | PTPRC       | NM_002838.4    | c.3464A>C          | p.E1155A        |                  | D                        | PrD                            | 24.4       | 10.400 |
| <b>P10</b>   | IL2RG       | NM_000206.2    | c.-83G>A           |                 |                  |                          |                                | 21.9       | 0.001  |
| <b>P11</b>   | ERCC3       | NM_000122.1    | c.1544C>G          | p.S515C         |                  | D                        | PoD                            | 27.9       | 0.001  |
|              | TCN2        | NM_000355.3    | c.529G>A           | p.D177N         | 0.001            | T                        | B                              | 16.3       | 0.001  |
| <b>P13</b>   | C3          | NM_000064.3    | c.125T>C           | p.M42T          | 0                | D                        | B                              | 18.1       | 0.001  |
| <b>P14</b>   | SLC7A7      | NM_001126106.2 | c.914T>C           | p.F305S         | 0.003            | D                        | PrD                            | 29.3       | 0.002  |
|              | MAVS        | NM_020746.4    | c.254C>T           | p.A85V          | 0.004            | T                        | PrD                            | 24.5       | 3.313  |
| <b>P15</b>   | G6PC        | NM_000151.3    | c.230+1G>C         |                 |                  |                          |                                | 34         | 6.870  |
| <b>P17</b>   | EPG5        | NM_020964.3    | c.3895C>G          | p.L1299V        |                  |                          | B                              | 16.5       | 0.006  |
| <b>P18</b>   | DOCK8       | NM_203447.3    | c.1943C>T          | p.T648I         |                  | D                        | PrD                            | 29         | 0.001  |
|              | TLR4        | NM_138554.4    | c.1144A>G          | p.R382G         | 0                | T                        | B                              | 13.6       | 3.313  |
|              | TMC6        | NM_007267.7    | c.536G>A           | p.R179Q         | 0.001            | T                        | PrD                            | 27.9       | 22.400 |
| <b>P19</b>   | RFXANK      | NM_003721.3    | c.421C>T           | p.R141C         | 0.006            | D                        | B                              | 23.3       | 21.600 |

### Supplementary Table S2

Additional variants identified, all variants are heterozygous except one homozygous variant found in P4 in the *FANCB* gene (\*). A, Activating; D, damaging; T, Tolerated; B, Benign; PoD, Possibly Damaging; PrD, Probably Damaging.

| Patient ID | Pneumococcal antibodies (prior IVIG; sufficient levels x/12 serotypes) | Pneumococcal immunization test (sufficient levels x/12 serotypes) | Predispositions                                                                     | FEV1 % VC | Faecal calprotectin (mg/kg; max if several) | Microbiology                                                   | Referred from dept.             | Prophylactic AB        | IVIG       |
|------------|------------------------------------------------------------------------|-------------------------------------------------------------------|-------------------------------------------------------------------------------------|-----------|---------------------------------------------|----------------------------------------------------------------|---------------------------------|------------------------|------------|
| 1          | Performed prior IVIG, data not available                               | NP                                                                | none                                                                                | NP        | NP                                          | Enterovirus (Faeces) x1                                        | Rheumatology / Respiratory med. | Moxifloxacin           | HyQvia     |
| 2          | Performed prior IVIG, data not available                               | Immunized after IVIG substitution                                 | Father: hyper-eosinophilic syndrome                                                 | NP        | 240                                         | none pos.                                                      | Gastroenterology                | none                   | Kiovig     |
| 3          | After IVIG                                                             | NP                                                                | Sister: coeliac or Mb. crohn                                                        | 80,9      | 117                                         | none pos.                                                      | GP                              | none                   | Gamma-norm |
| 4          | NP                                                                     | NP                                                                | none                                                                                | 83        | NP                                          | Enterobacteriaceae                                             | Pulmonary medicine              | none                   | Hizentra   |
| 5          | After IVIG                                                             | NP                                                                | none                                                                                | 74        | NP                                          | <i>Streptococcus pneumoniae</i> in sputum.<br>Oral candidiasis | Internal med.                   | Azitromycin            | Hizentra   |
| 6          | After IVIG                                                             | NP                                                                | none                                                                                | 104       | NP                                          | <i>Pseudomonas aeruginosa</i> (ascites)                        | unknown                         | Azitromycin            | HyQvia     |
| 7          | NP                                                                     | NP                                                                | Grandmother: psoriasis.<br>Grandfather and father: RA. Son IgG subclass deficiency. | 99        | NP                                          | none pos.                                                      | unknown                         | Azitromycin            | Hizentra   |
| 8          | Normal                                                                 | NP                                                                | Brother Mb. Crohn                                                                   | NP        | 328                                         | none pos.                                                      | Gastroenterology                | Valacyclovir, Anakinra | Gamma-norm |
| 9          | NP                                                                     | NP                                                                | none                                                                                | NP        | NP                                          | <i>H. Influenzae</i> x 9 sputum + x 2                          | Haematology                     | Azitromycin            | Privigen   |

|    |                                          |        |                                                                     |     |      |                                                                                 |                    |             |                                      |
|----|------------------------------------------|--------|---------------------------------------------------------------------|-----|------|---------------------------------------------------------------------------------|--------------------|-------------|--------------------------------------|
| 10 | NP                                       | NP     | mother: asthma, thyroiditis. Father: DMII                           | NP  | 1266 | Sputum: <i>Haemophilus influenzae</i> , <i>Moxarella catarrhalis</i> , VZV, GBS | unknown            | Sulfotrim   | Hizentra                             |
| 11 | NP                                       | NP     | none                                                                | NP  | NP   | <i>Clostridium difficile</i> (faeces)                                           | Internal medicine  | Unknown     | Unknown                              |
| 12 | NP                                       | NP     | Father: pancreatic cancer (died 62), half-brother colon cancer (66) | NP  | 192  | none pos.                                                                       | Haematology        | Sulfotrim   | Gamma-norm                           |
| 13 | NP                                       | NP     | father and brother: cardiomyopathy                                  | NP  | 392  | none pos.                                                                       | Gastroenterology   | Azitromycin | HyQvia                               |
| 14 | NP                                       | NP     | none                                                                | 82  | 1800 | none pos.                                                                       | unknown            | none        | Hizentra                             |
| 15 | Decreased                                | [7/12] | parents: irritable bowel diseases + thrombotic events               | 93  | 1147 | <i>Clostridium difficile</i> (faeces)                                           | Gastroenterology   | none        | none (anaphylactic reaction on IVIG) |
| 16 | Decreased                                | [5/12] | Mother + uncle colon cancer.                                        | 61  | NP   |                                                                                 | Haematology        | Azitromycin | HyQvia                               |
| 17 | Performed prior IVIG, data not available |        | none                                                                | 91  | NP   |                                                                                 | Haematology        | Azitromycin | Gamma-norm                           |
| 18 | NP                                       | NP     | none                                                                | 108 | NP   | none pos.                                                                       | Haematology        | Azitromycin | Hizentra                             |
| 19 | Performed prior IVIG, data not available | NP     | none                                                                | NP  | NP   | none pos.                                                                       | Pulmonary medicine | none        | Hizentra                             |
| 20 | Decreased (6/12)                         | NP     | Mother, brother: Sarcoidosis.                                       | NP  | NP   | <i>Staph. aureus</i> (skin, tonsils)                                            | Pulmonary medicine | Azitromycin | None                                 |

**Supplementary Table S3. Additional clinical and paraclinical information.**

| patient ID | Naïve B cells           | Transitional B cells | Class-switched memory | Plasmablasts        | MZ-like             | CD21 low          |
|------------|-------------------------|----------------------|-----------------------|---------------------|---------------------|-------------------|
|            | CD19+IgD+CD27-<br>CD38- | CD19+IgD+CD27-CD38+  | CD19+IgD-CD27+CD38-   | CD19+IgD-CD27+CD38- | CD19+IgD+CD27+CD38- | CD19+CD21lowCD38- |
| 1          | 92,8                    | 0.9                  | 0.2                   | 0                   | 5.1                 | 11.6              |
| 2          | #                       | #                    | #                     | #                   | #                   | #                 |
| 3          | 53                      | 7                    | 1                     | 0.1                 | 30                  | 11                |
| 4          | 19,4                    | 13.3                 | 0.3                   | 0.5                 | 63.8                | 73.3              |
| 5          | 77.8                    | 9.3                  | 3.7                   | 0                   | 0.9                 | 24.1              |
| 6          | 73.2                    | 22.7                 | 0.3                   | 0.2                 | 0.7                 | 14.7              |
| 7          | 29.2                    | 65.1                 | 0.1                   | 0                   | 0.3                 | 0.8               |
| 8          | 67,9                    | 16.4                 | 1                     | 0.4                 | 6,5                 | 7                 |
| 9          | 71                      | 23.4                 | 0.6                   | 0                   | 1.2                 | 7.3               |
| 10         | 65.6                    | 32.2                 | 0.6                   | 0.1                 | 0.4                 | 4.3               |
| 11         | 75.3                    | 11.2                 | 1.4                   | 0.4                 | 7,2                 | 14.6              |
| 12         | 75.2                    | 20.9                 | 0.1                   | 0.3                 | 2.8                 | 5                 |
| 13         | 80,9                    | 5.7                  | 0.5                   | 0.2                 | 1.3                 | 34.9              |
| 14         | 75.3                    | 4.5                  | 0.1                   | 0.1                 | 19                  | 36                |
| 15         | 44.1                    | 3.6                  | 23,6                  | 0.2                 | 20.3                | 8                 |
| 16         | 39.3                    | 1.7                  | 2.1                   | 1                   | 3.5                 | 9                 |
| 17         | 61.3                    | 19.3                 | 0.6                   | 0.2                 | 12.4                | 34.1              |
| 18         | 79.7                    | 12.4                 | 0.1                   | 0                   | 5                   | 24.1              |
| 19         | 87.3                    | 0.6                  | 1                     | 0                   | 7.7                 | 21.6              |
| 20         | 81.4                    | 2.1                  | 2.6                   | 0,9                 | 10.7                | 4,2               |

**Supplementary Table S4. B cell subsets.** Central 95% prediction intervals for more than 140 blood donors in percentage (reference values): Naïve B cells (41-79); Transitional B cells (1.5-10); class-switched, memory (4.8-28); Plasmablasts (0.1-0.9), MZ-like (4.7-39); CD21 low (2.4-15). # No data available. Red: decreased values; Blue: increased values.

| patient ID | Naive, % of CD4+              | Central memory % of CD4+      | Effector memory % of CD4+ | Naive, % of CD8+              | Central memory % of CD8+      | Effector memory % of CD8+ |
|------------|-------------------------------|-------------------------------|---------------------------|-------------------------------|-------------------------------|---------------------------|
|            | CD3+CD4+CD8-CCR7+CD27+CD45RA+ | CD3+CD4+CD8-CCR7+CD27+CD45RA+ | CD3+CD4+CD8-CCR7-         | CD3+CD4-CD8+CCR7+CD27+CD45RA+ | CD3+CD4-CD8+CCR7+CD27+CD45RA- | CD3+CD4-CD8+CCR7-         |
| 1          | 7,6                           | 47.0                          | 41.0                      | 3.7                           | 22.4                          | 72.8                      |
| 2          | #                             | #                             | #                         | #                             | #                             | #                         |
| 3          | 14.4                          | 57.0                          | 27.5                      | 23.5                          | 18.8                          | 56.8                      |
| 4          | 8.8                           | 75.0                          | 12.3                      | 8.0                           | 9.6                           | 81.9                      |
| 5          | 7.1                           | 37.4                          | 53.1                      | 3.2                           | 4.2                           | 92.2                      |
| 6          | 2.3                           | 36.2                          | 59.5                      | 2.5                           | 2.9                           | 93.2                      |
| 7          | 6.4                           | 56.4                          | 35.4                      | 4.4                           | 3.5                           | 91.6                      |
| 8          | 3.2                           | 4.0                           | 91.9                      | 2.8                           | 0.5                           | 96.0                      |
| 9          | 0.6                           | 23.1                          | 73.1                      | 13.7                          | 23.3                          | 3.1                       |
| 10         | 7.5                           | 58.2                          | 30.8                      | 11.6                          | 18.5                          | 66.6                      |
| 11         | 22.3                          | 52.7                          | 21.1                      | 6.4                           | 1.2                           | 91.3                      |
| 12         | 23.3                          | 62.5                          | 10.9                      | 16.9                          | 13.1                          | 66.6                      |
| 13         | 21.5                          | 63.5                          | 11.8                      | 39.4                          | 28.6                          | 29.8                      |
| 14         | 57.3                          | 24.9                          | 16.7                      | 13.7                          | 3.1                           | 82.8                      |
| 15         | 47.5                          | 45.5                          | 5.3                       | 65.0                          | 17.2                          | 17.3                      |
| 16         | 62.4                          | 25.0                          | 11.5                      | 44.5                          | 7.1                           | 47.9                      |
| 17         | 4.4                           | 59.9                          | 32.9                      | 12.6                          | 10.8                          | 76.0                      |
| 18         | 20.8                          | 64.6                          | 12.3                      | 31,7                          | 5.8                           | 61.6                      |
| 19         | 24.1                          | 55.6                          | 18.6                      | 44.9                          | 13.8                          | 41.0                      |
| 20         | 79.8                          | 0.1                           | 7.1                       | 33.0                          | 0.0                           | 67.4                      |

# No data available

**Supplementary Table S5. T cell subsets.** Numbers represent naïve, central memory and effector memory fractions of total CD4+ or CD8+ T cells respectively Reference values: Naive, % of CD4+ (25-73); Central memory, % of CD4+ (19-53); Effector memory, % of CD4+ (4.7-46); Naive, % of CD8+ (6.8-73); Central memory, % of CD8+ (2.4-26); Effector memory, % of CD8+ (18.3-90.2). Red: decreased values; Blue: increased values
